# Supplementary material for: Radioiodination of Aryl-Alkyl Cyclic Sulfates
Source: Molecules. 2012 Nov 7;17(11):13266–74. doi: 10.3390/molecules171113266 (PMC4422485; doi:10.3390/molecules171113266)

## Supplementary Information

**Figure S1.** Iodination of cyclic sulfoester **6** with formation of iodide **7**. Reaction mixture HPLC, UV detection (see text).

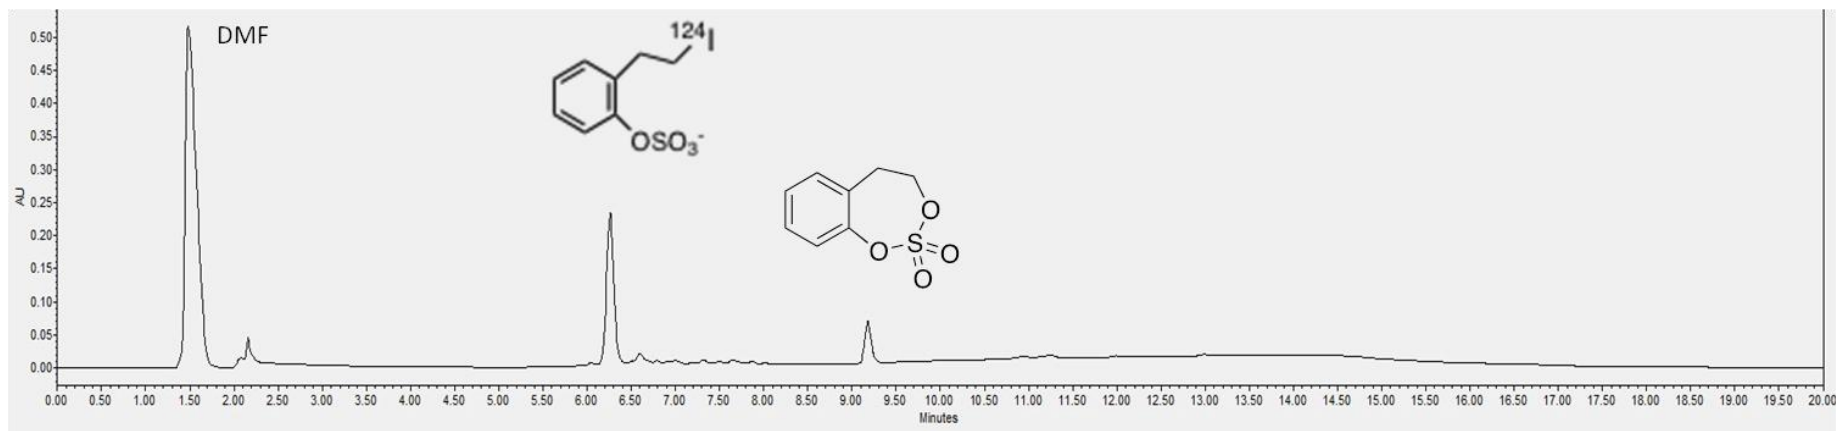

**Figure S2.** Radioiodination of the cyclic sulfoester **6** with formation of radioactive iodide [ $^{124}\text{I}$ ]**7**. Reaction mixture HPLC, gamma detection (see text). Note that the low (subpicomolar) concentrations result in peak broadening as compared to the HPLC trace in the Figure S1.

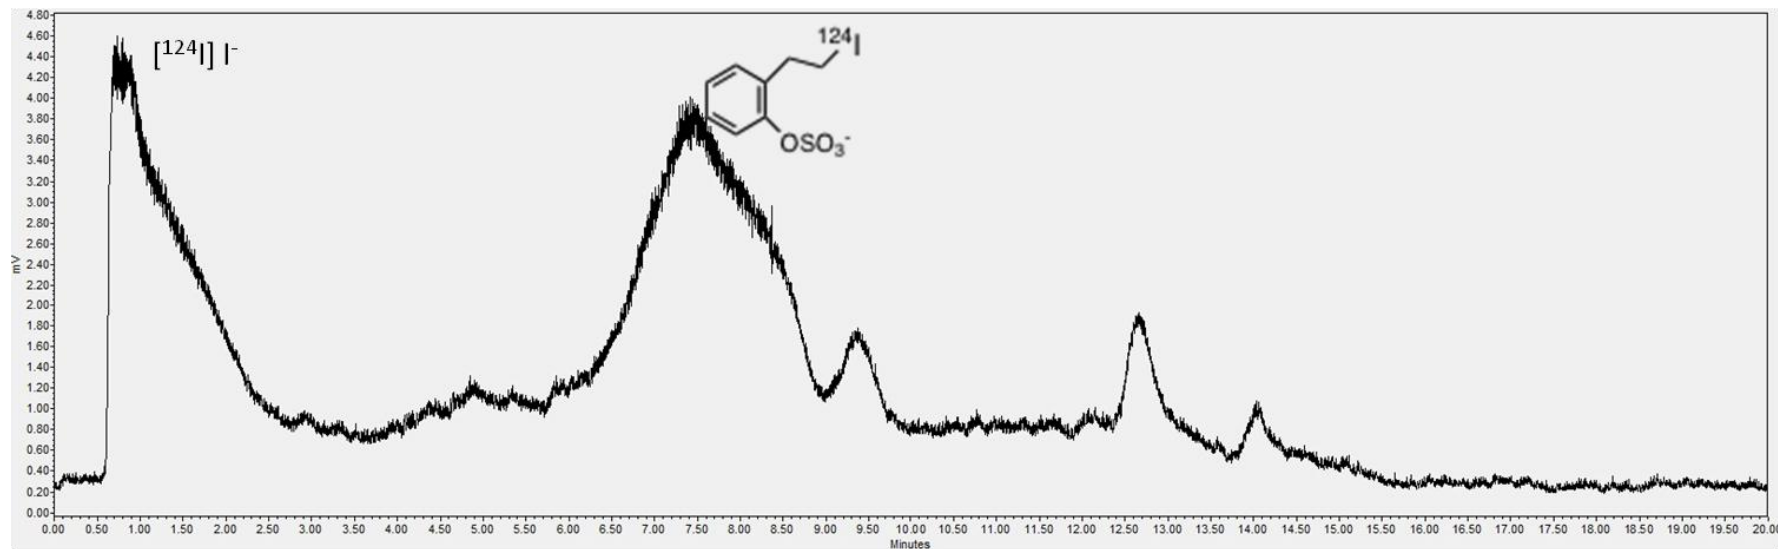

Supplement: Supplementary file 1 [file molecules-17-13266-s001.pdf]
